# Supplementary material for: Circulating Sclerostin Levels Are Positively Related to Coronary Artery Disease Severity and Related Risk Factors
Source: PubMed Central journal article supplement (PMC9377011; doi:10.1002/jbmr.4467), 2021-12-09
Supplement: JBMR-37-273-s001.pdf [file JBMR-37-273-s001.pdf]

## Circulating sclerostin levels are positively related to coronary artery disease severity and related risk factors

M Frysz<sup>1,5</sup>, I Gergei<sup>2,3</sup>, H Scharnagl<sup>4</sup>, G Davey Smith<sup>5</sup>, J Zheng<sup>5</sup>, DA Lawlor<sup>5,6</sup>, M Herrmann<sup>4</sup>, W Maerz<sup>2,4,7</sup>, JH Tobias<sup>1,5</sup>

### Supplementary Tables and Figures

**Supplementary Table 1: Sclerostin versus clinical risk factors - additional adjustment for fasting glucose.**

| Exposure   | Outcome      | Model | LURIC N=2054        |        | ALSPAC N=2977       |        |
|------------|--------------|-------|---------------------|--------|---------------------|--------|
|            |              |       | $\beta$ (95% CI)    | p      | $\beta$ (95% CI)    | p      |
| Sclerostin | eGFR         | 2     | -0.29 (-0.33,-0.25) | <0.001 | -0.11 (-0.15,-0.08) | <0.001 |
| Sclerostin | eGFR         | 3     | -0.29 (-0.33,-0.25) | <0.001 | -0.11 (-0.15,-0.08) | <0.001 |
|            |              |       | OR (95% CI)         |        | OR (95% CI)         |        |
| Sclerostin | Hypertension | 2     | 1.04 (0.93,1.17)    | 0.459  | 1.20 (1.03,1.41)    | 0.021  |
| Sclerostin | Hypertension | 3     | 1.03 (0.92,1.15)    | 0.592  | 1.20 (1.02,1.40)    | 0.025  |

Table shows results of linear/logistic regression analysis. Results are SD change in outcome/ odds of outcome per SD increase in sclerostin, 95% CI and p value. CI: Confidence Interval, eGFR: estimated Glomerular filtration rate. Model 2: adjusted for age and ethnic group (ALSPAC) and sex (LURIC), BMI, smoking, social deprivation. Model 3: Model 2 + fasting glucose (continuous measure).

**Supplementary Table 2: Univariate associations between sclerostin and other risk factors in ALSPAC and LURIC**

| Exposure                         | Outcome    | LURIC N=2054        |        | ALSPAC N=3015                 |                          |
|----------------------------------|------------|---------------------|--------|-------------------------------|--------------------------|
|                                  |            | $\beta$ (95% CI)    | p      | $\beta$ (95% CI)              | p                        |
| <b>sex</b>                       | Sclerostin | -0.38 (-0.47,-0.29) | <0.001 |                               |                          |
| <b>Age (years)</b>               | Sclerostin | 0.20 (0.16,0.24)    | <0.001 | <b>Age (years)</b>            | 0.19 (0.16,0.23) <0.001  |
| <b>BMI (kg/m<sup>2</sup>)</b>    | Sclerostin | 0.01 (-0.03,0.06)   | 0.504  | <b>BMI (kg/m<sup>2</sup>)</b> | 0.01 (-0.02,0.05) 0.536  |
| <b>ex-smoker*</b>                | Sclerostin | 0.25 (0.16,0.35)    | <0.001 | <b>Smoking (no vs yes)</b>    | 0.01 (-0.06,0.08) 0.791  |
| <b>active smoker*</b>            | Sclerostin | -0.16 (-0.15,-0.01) | <0.001 |                               |                          |
|                                  |            |                     |        |                               |                          |
| <b>Regional purchasing index</b> | Sclerostin | -0.03 (-0.07,0.04)  | 0.208  | <b>Townsend score 2</b>       | 0.04 (-0.05,0.15) 0.360  |
|                                  |            |                     |        | <b>Townsend score 3</b>       | -0.06 (-1.16,0.04) 0.254 |
|                                  |            |                     |        | <b>Townsend score 4</b>       | 0.06 (-0.04,0.16) 0.271  |
|                                  |            |                     |        | <b>Townsend score 5</b>       | -0.02 (-0.17,0.13) 0.818 |

Table shows results of linear regression analysis. Results are SD change in outcome per SD change in exposure/difference in exposure level in case of categorical exposures, 95% CI and p value.

\*results attenuated following adjustment for age and sex;

**ex-smoker** [adjusted beta 0.11, CI(0.01, 0.21) p = 0.034]

**active smoker** [adjusted beta -0.10, CI(-0.22, 0.02) p = 0.114]

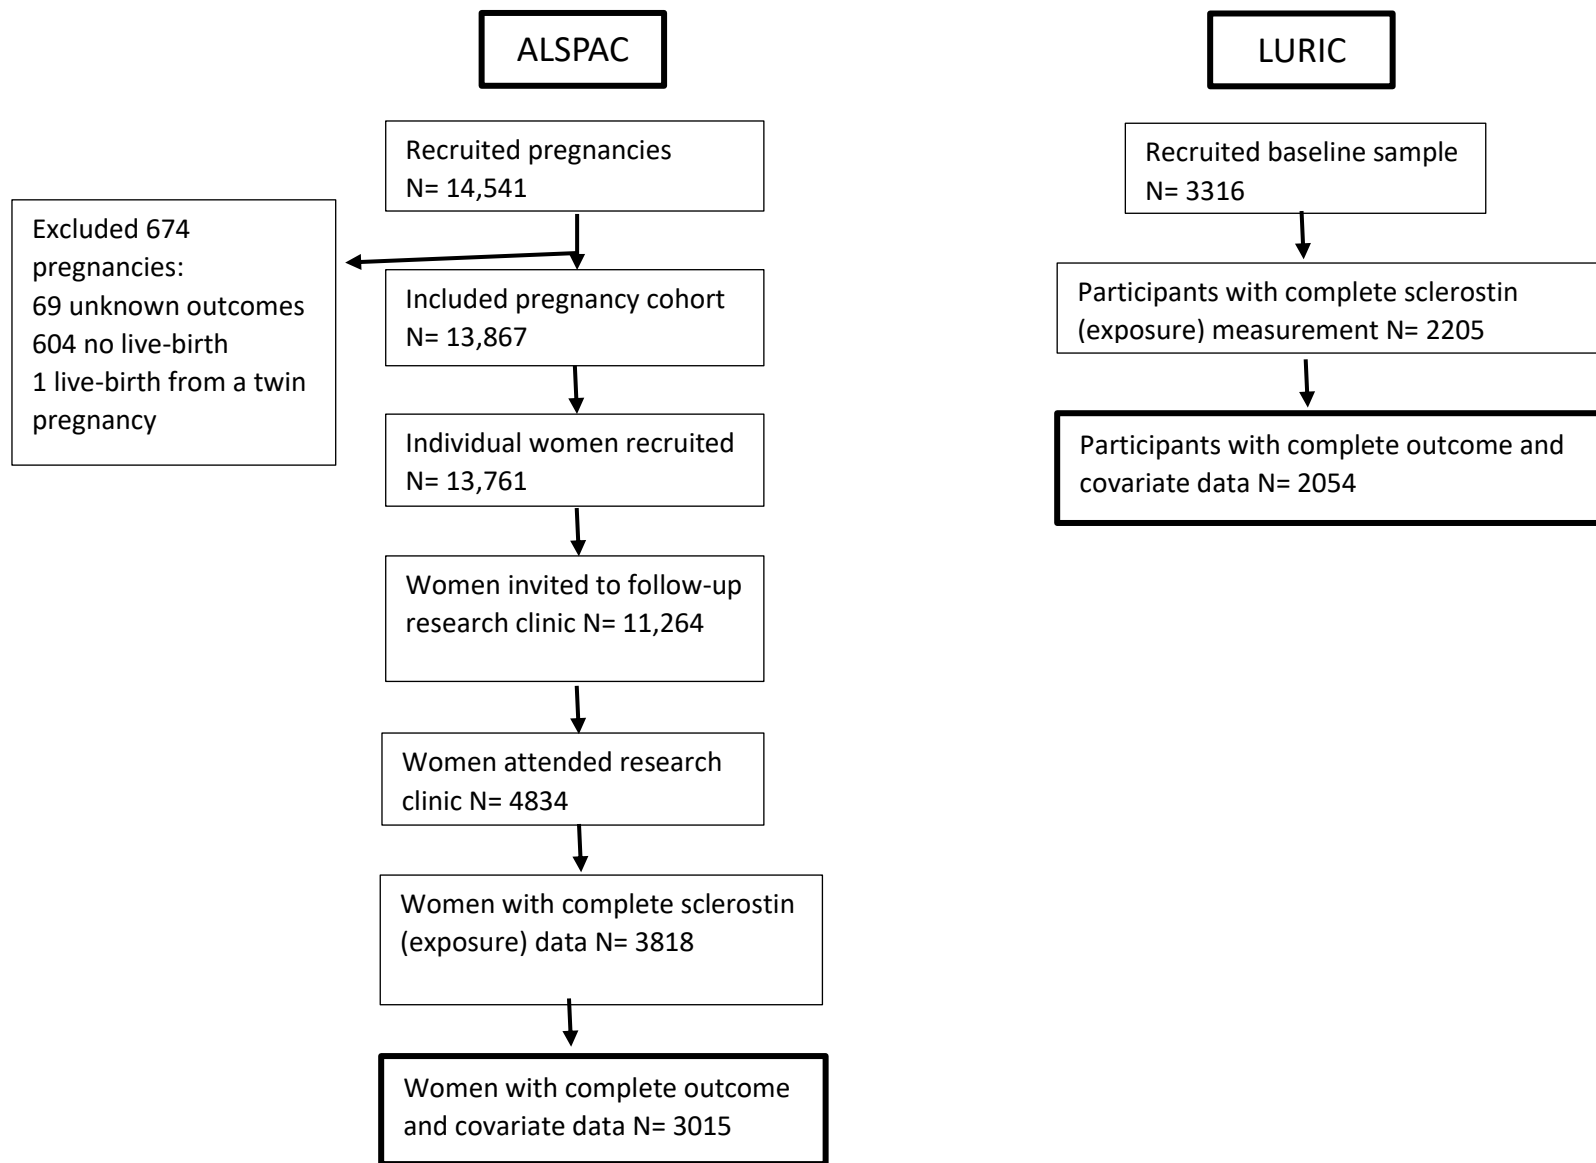

**Supplementary Figure 1: Flow diagram showing the distribution of ALSPAC and LURIC participants from the recruitment to the present study population.**

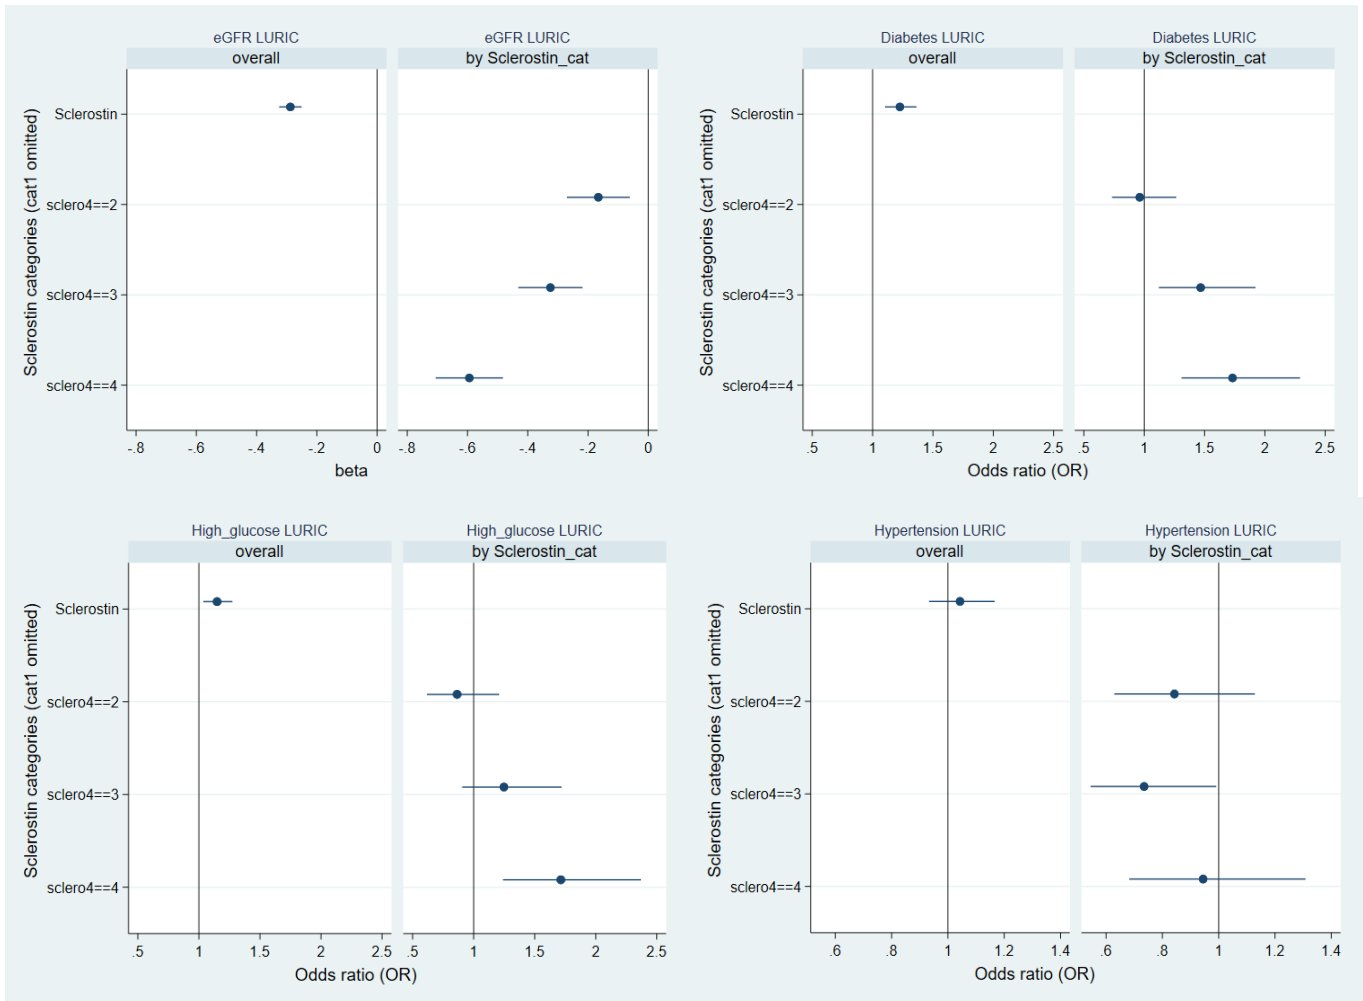

**Supplementary Figure 2: Associations between sclerostin versus clinical risk factors (LURIC). Overall sclerostin (continuous measure) vs categorical sclerostin.**

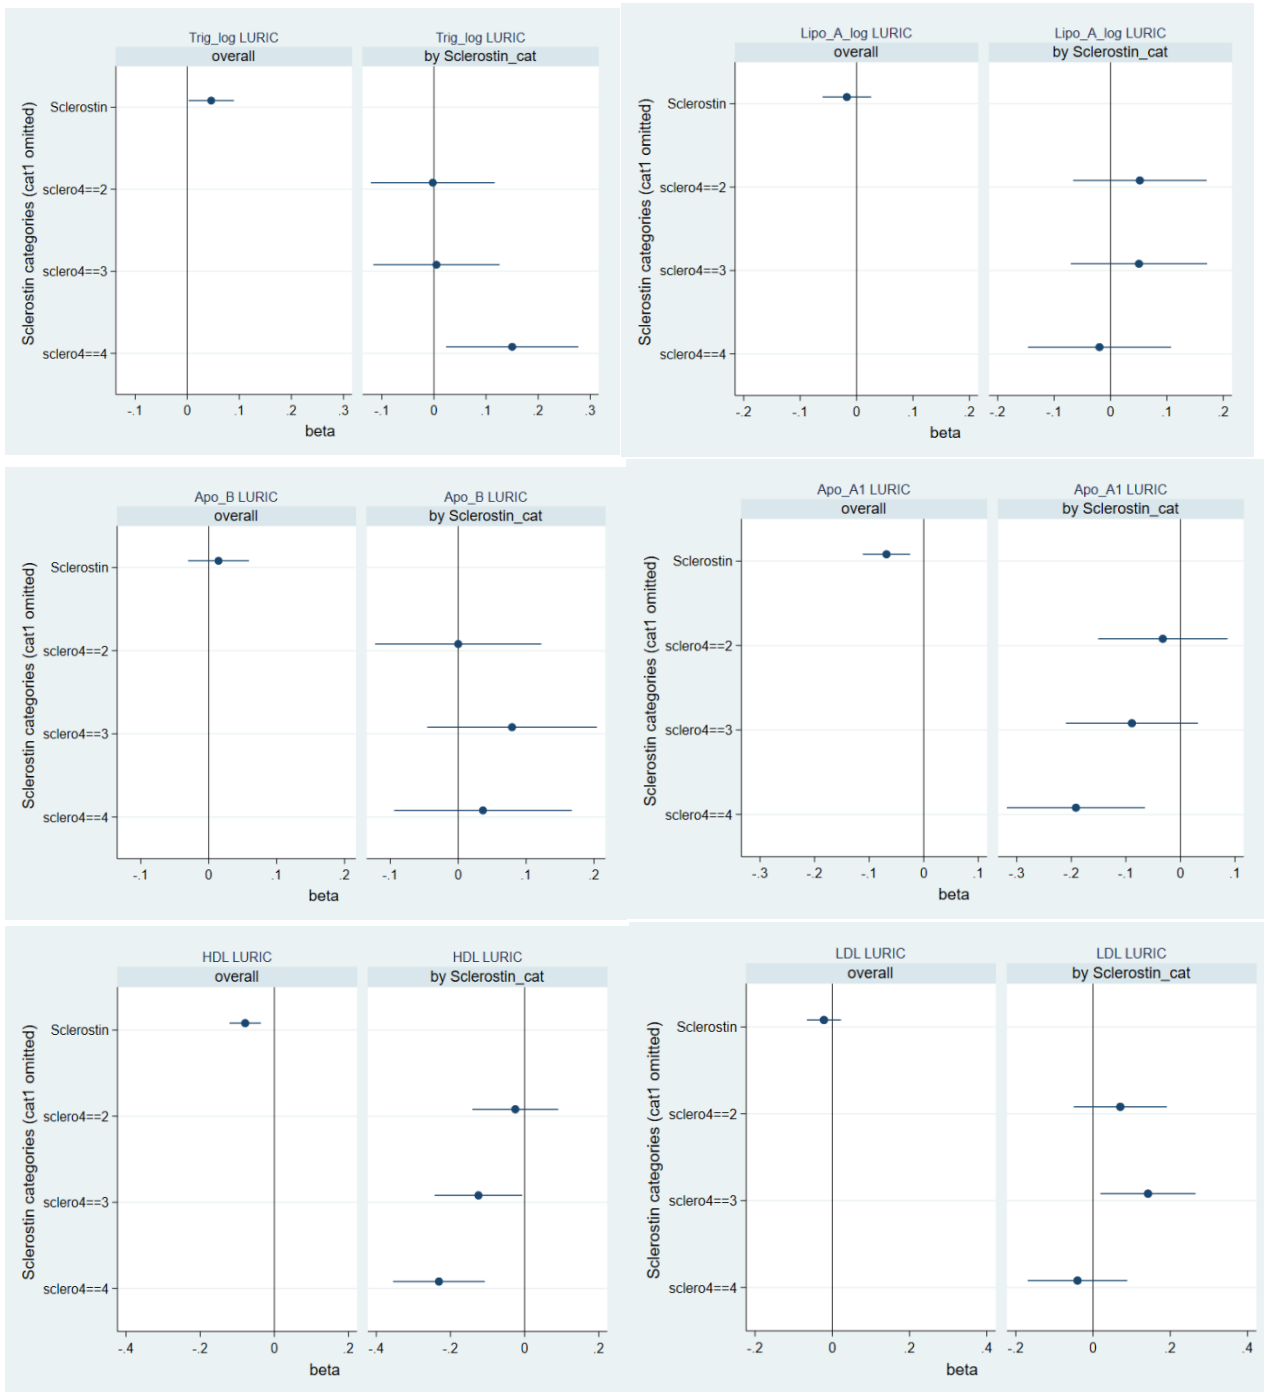

**Supplementary Figure 3: Associations between sclerostin versus lipids (LURIC). Overall sclerostin (continuous measure) vs categorical sclerostin.**

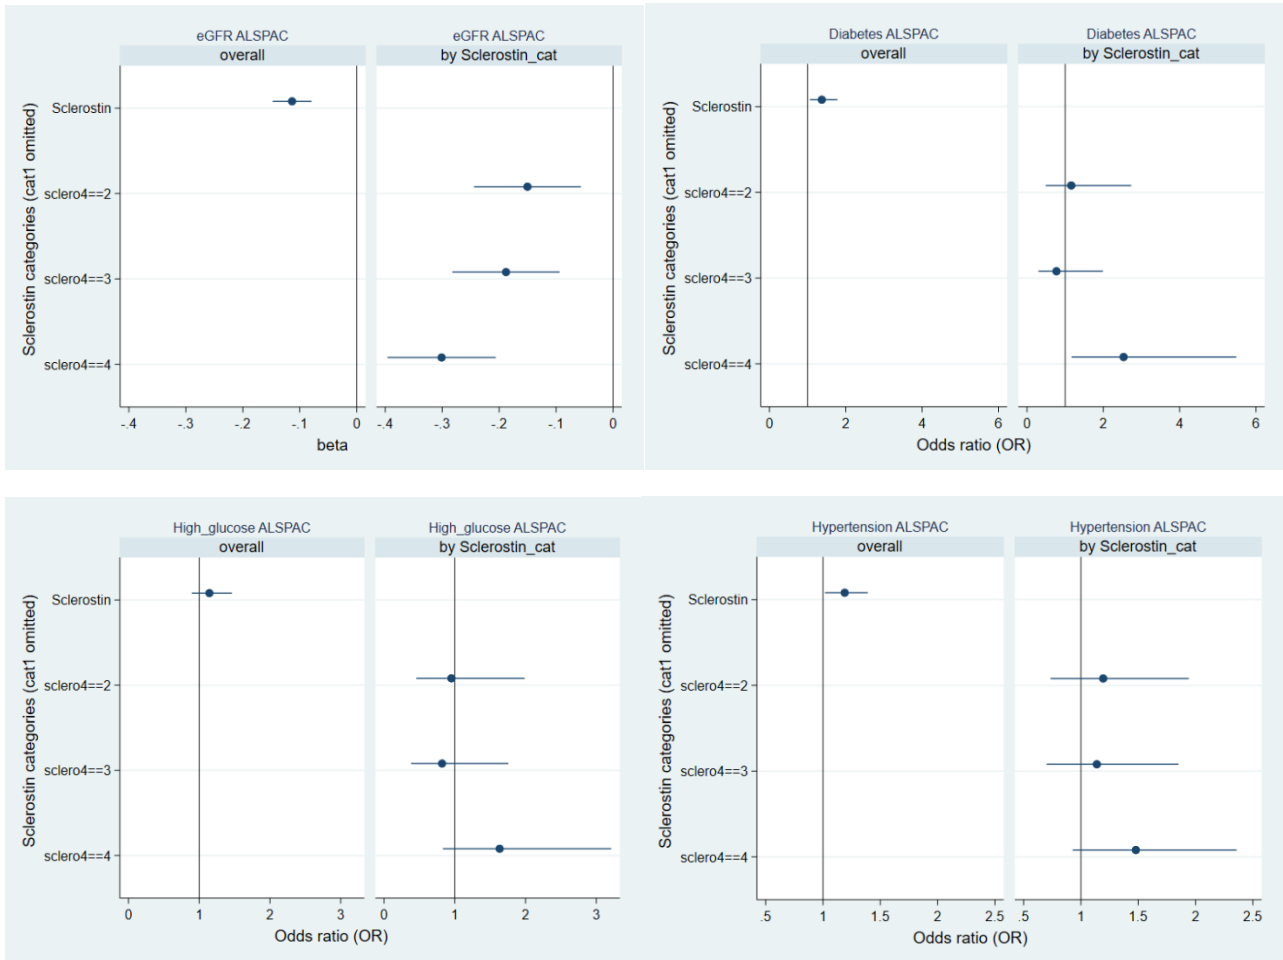

**Supplementary Figure 4: Associations between sclerostin versus clinical risk factors (ALSPAC). Overall sclerostin (continuous measure) vs categorical sclerostin.**

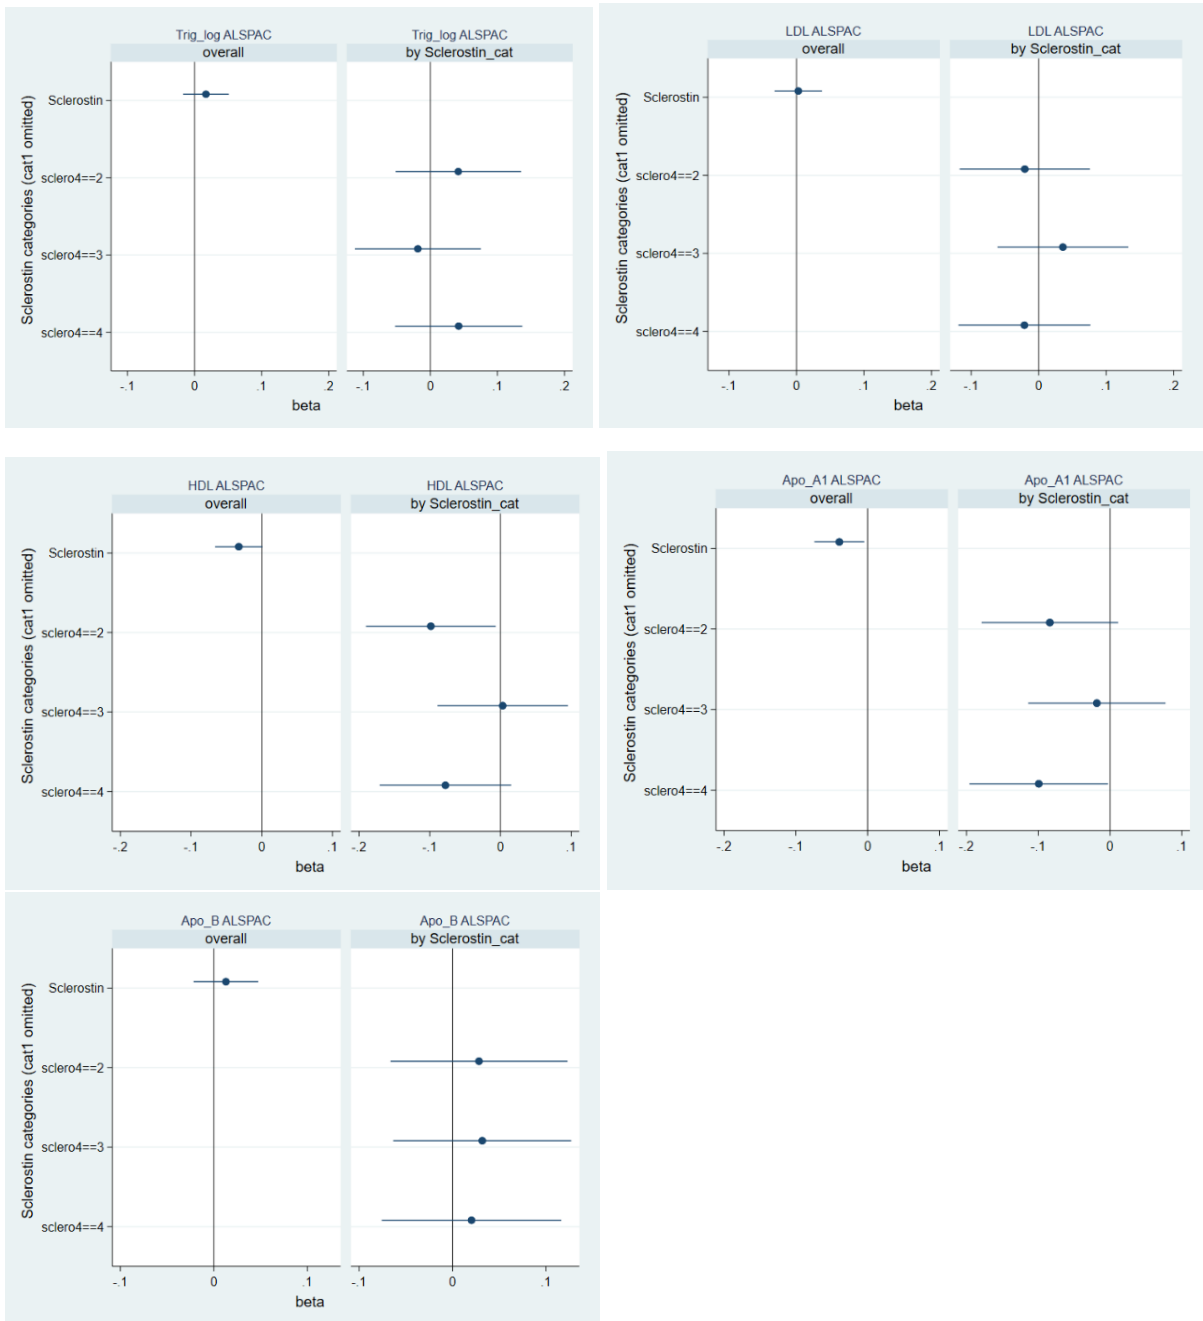

**Supplementary Figure 5: Associations between sclerostin versus lipids (ALSPAC). Overall sclerostin (continuous measure) vs categorical sclerostin.**

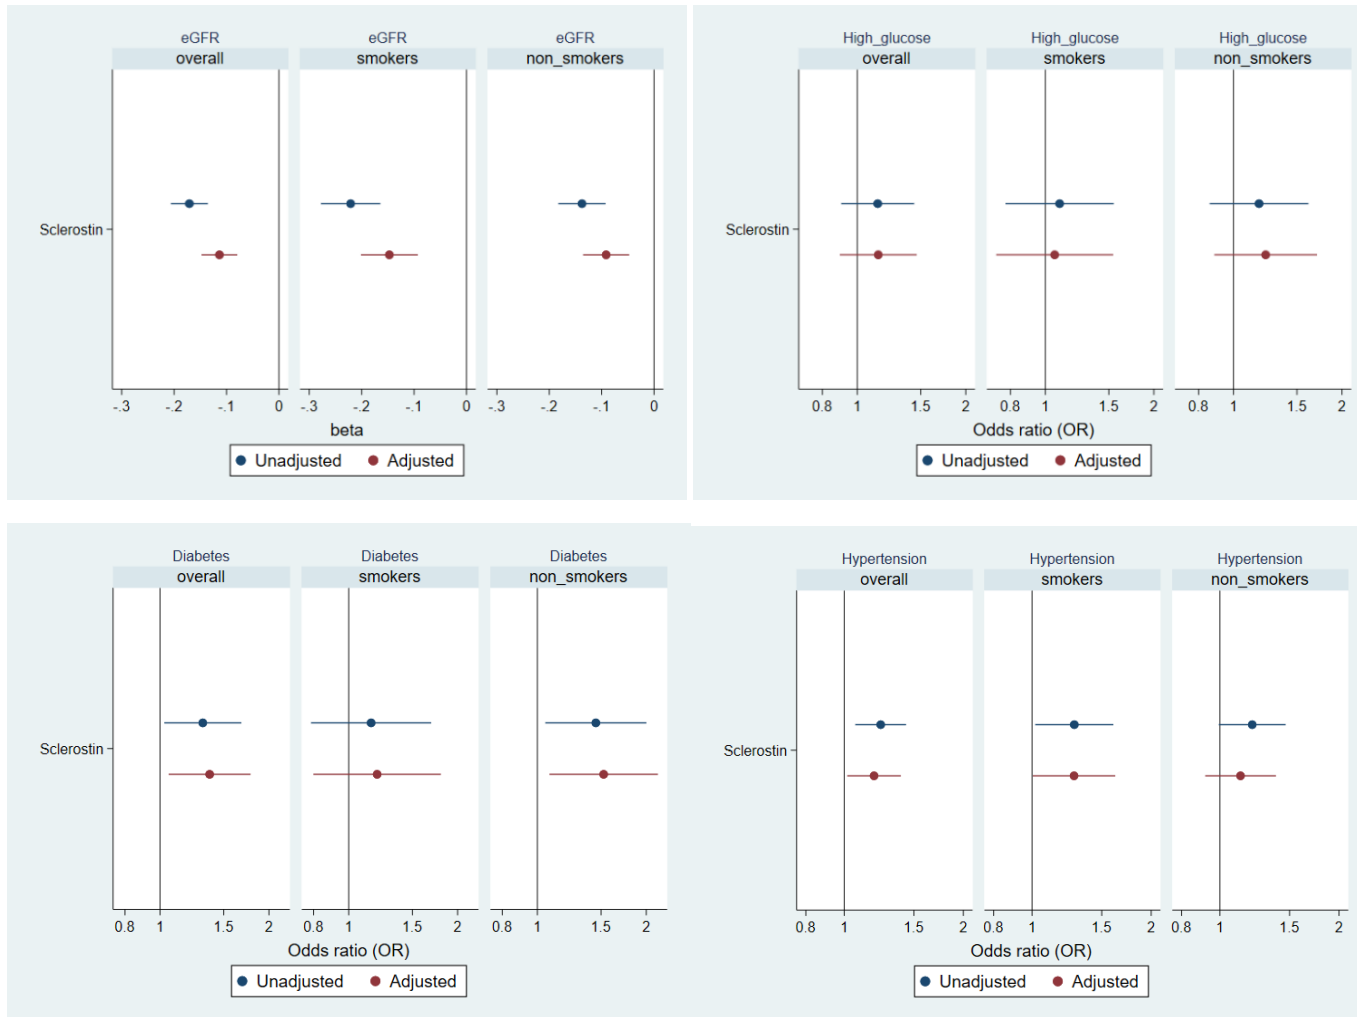

**Supplementary Figure 6: Associations between sclerostin and clinical risk factors by smoking status in ALSPAC mothers.**



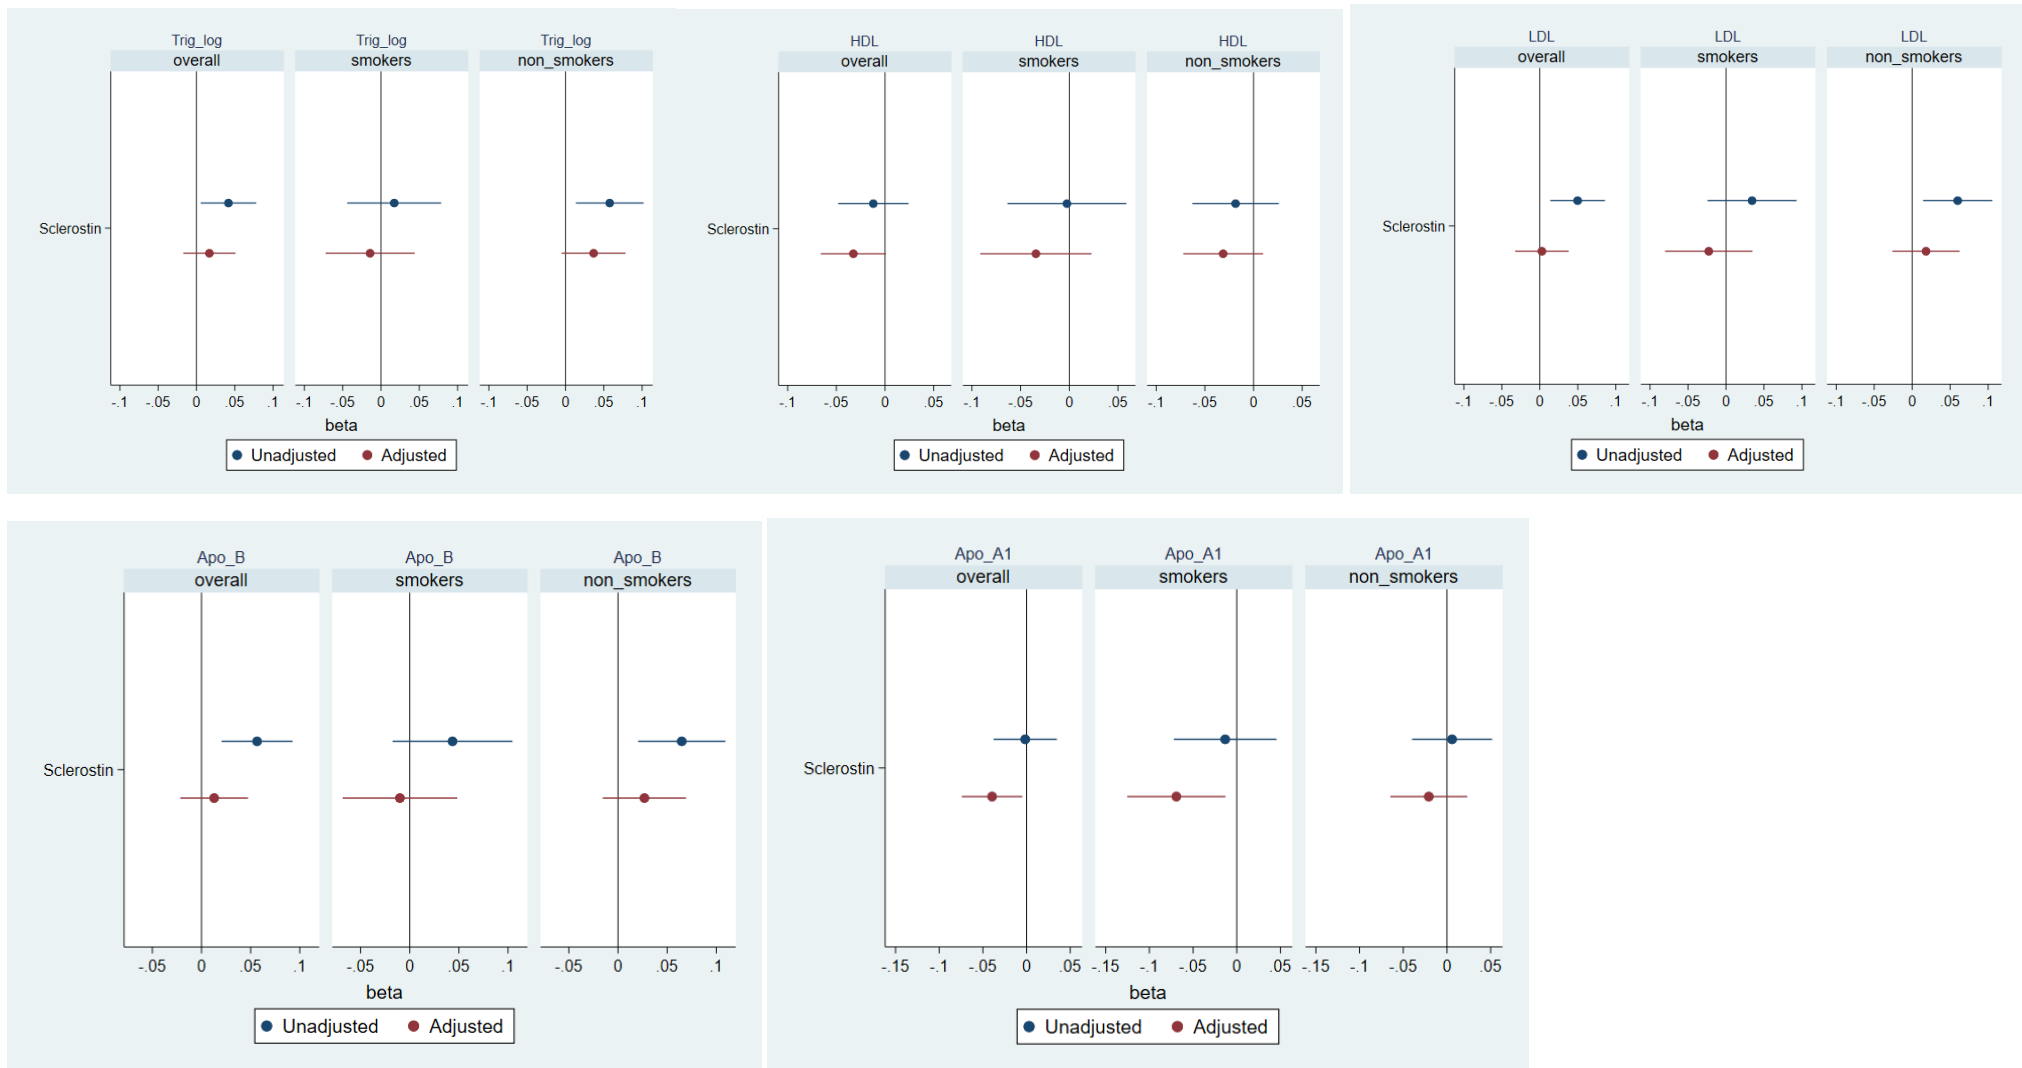

**Supplementary Figure 7: Associations between sclerostin versus lipids stratified by smoking status in ALSPAC.**

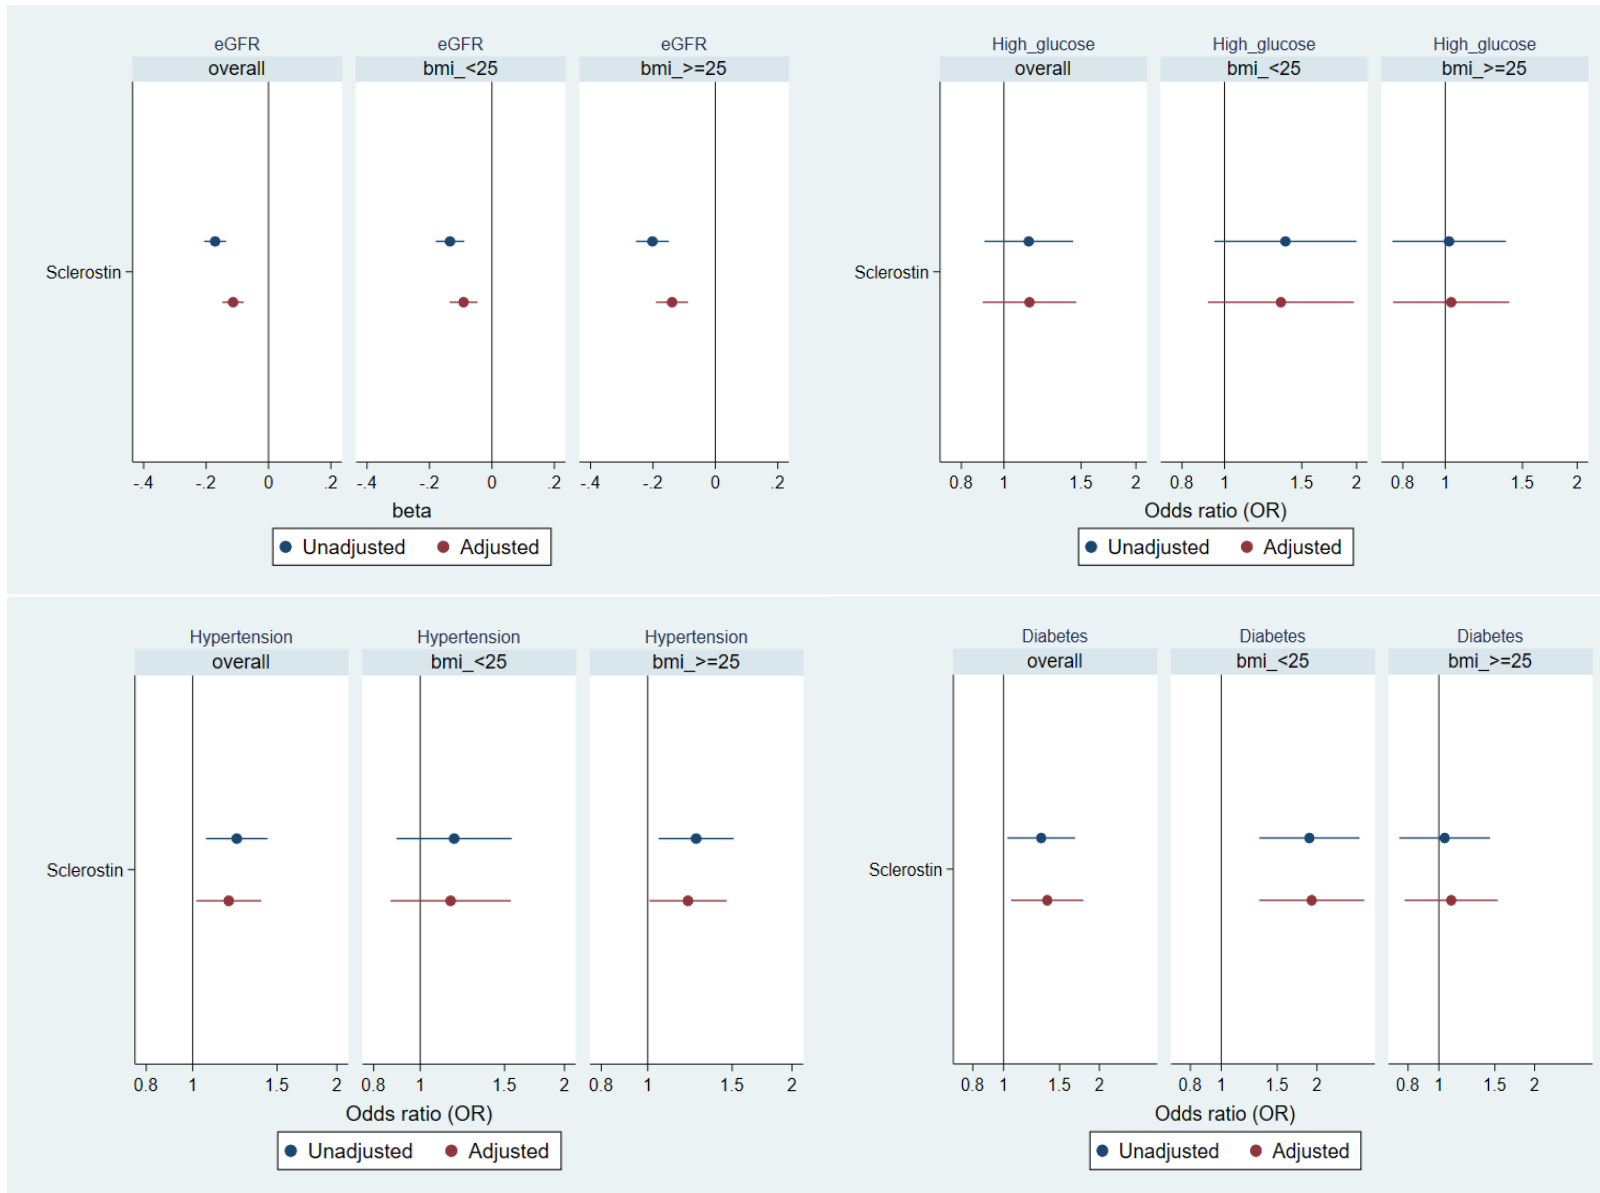

**Supplementary Figure 8: Associations between sclerostin and clinical risk factors stratified by BMI category in ALSPAC.**

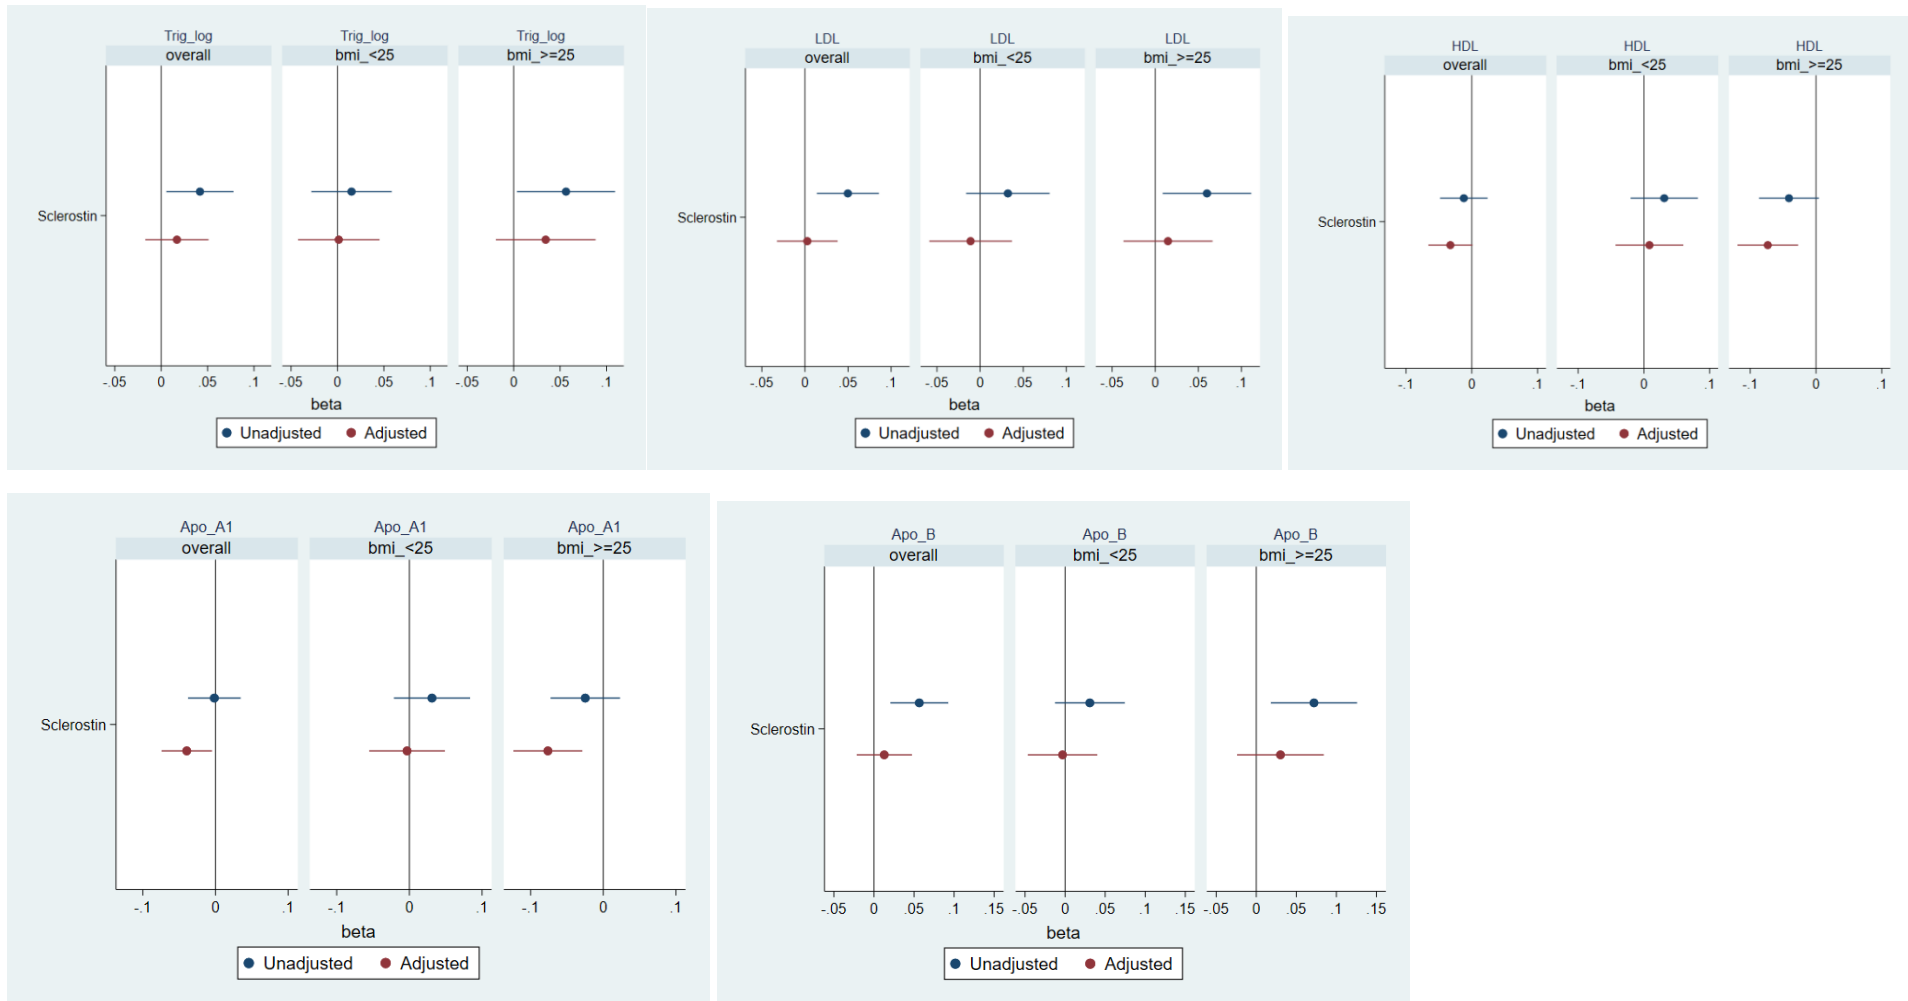

Supplementary Figure 9: Associations between sclerostin versus lipids stratified by BMI category in ALSPAC.

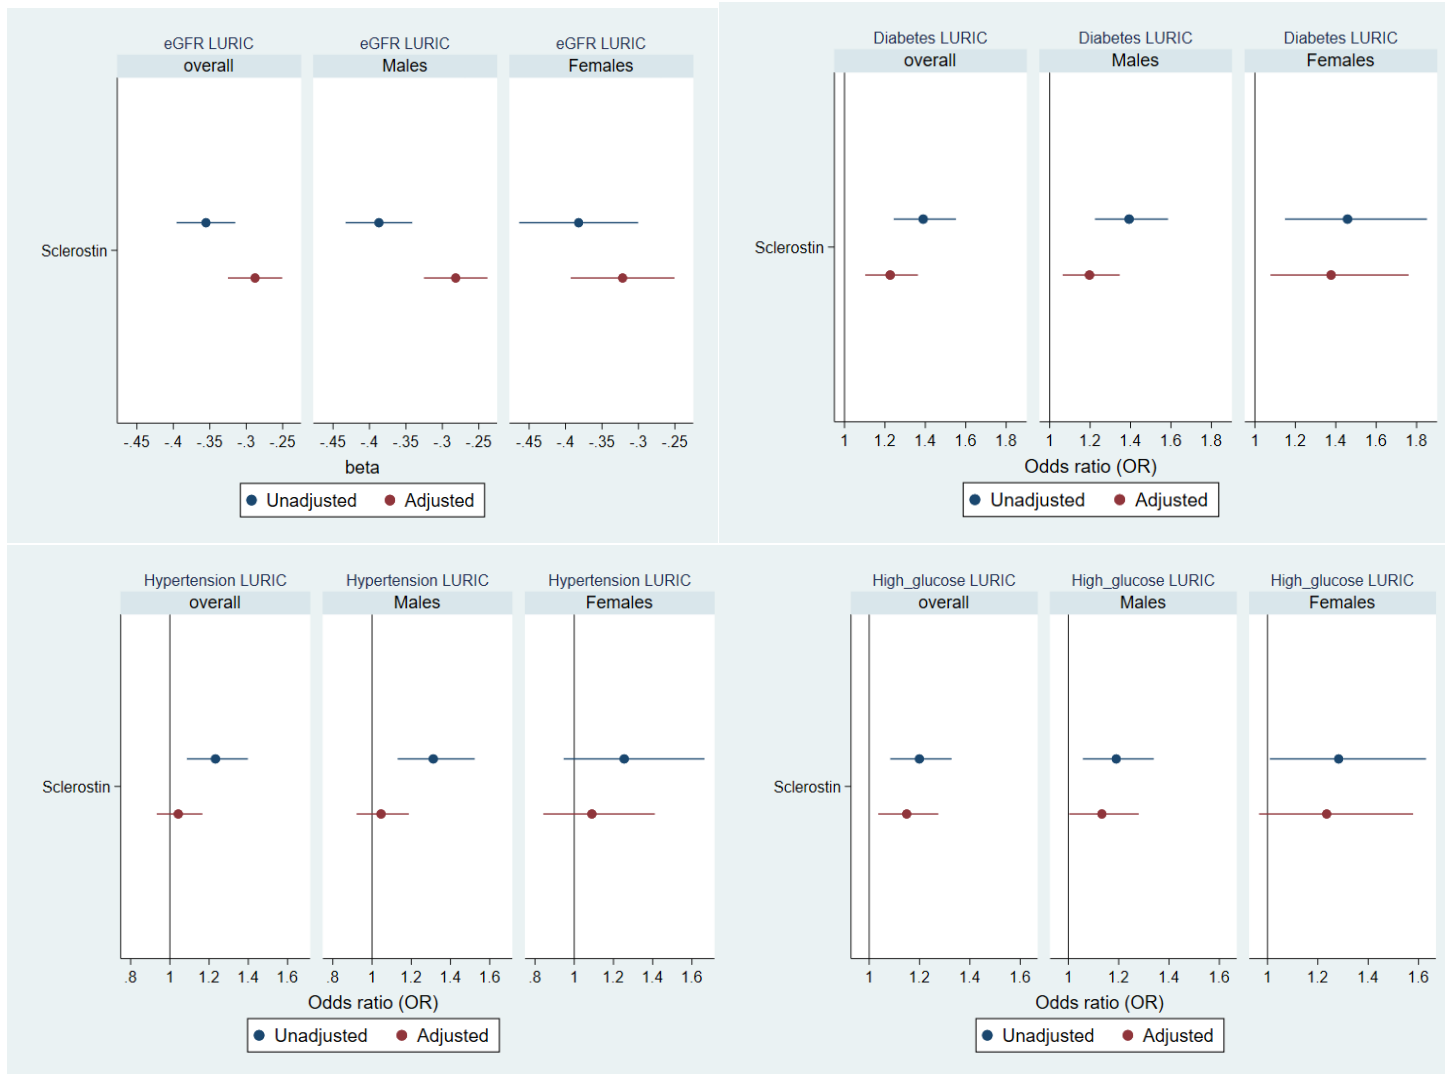

Supplementary Figure 10: Associations between sclerostin and clinical risk factors stratified by sex in LURIC.

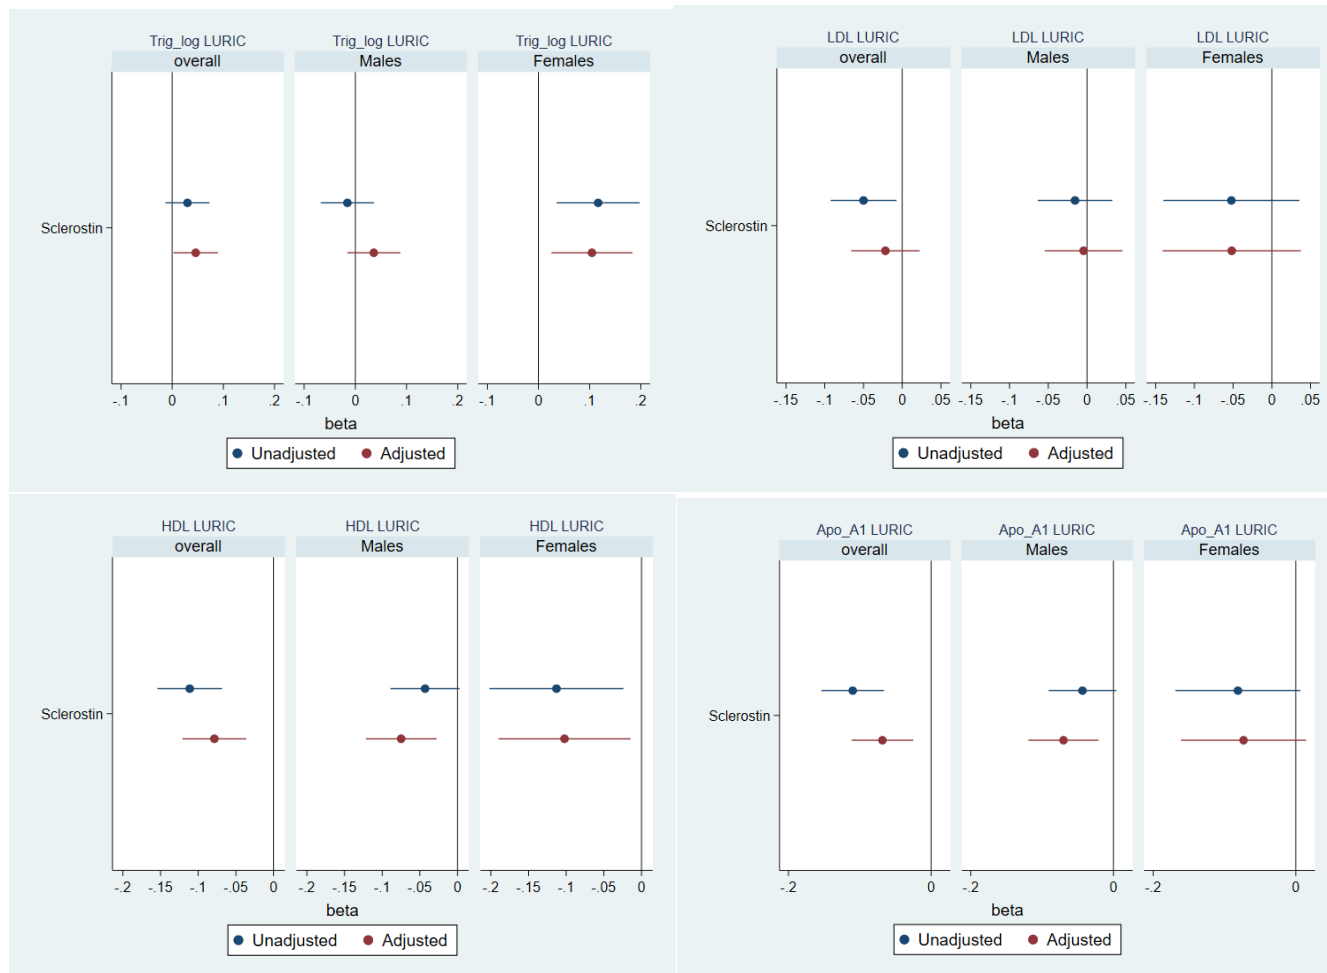

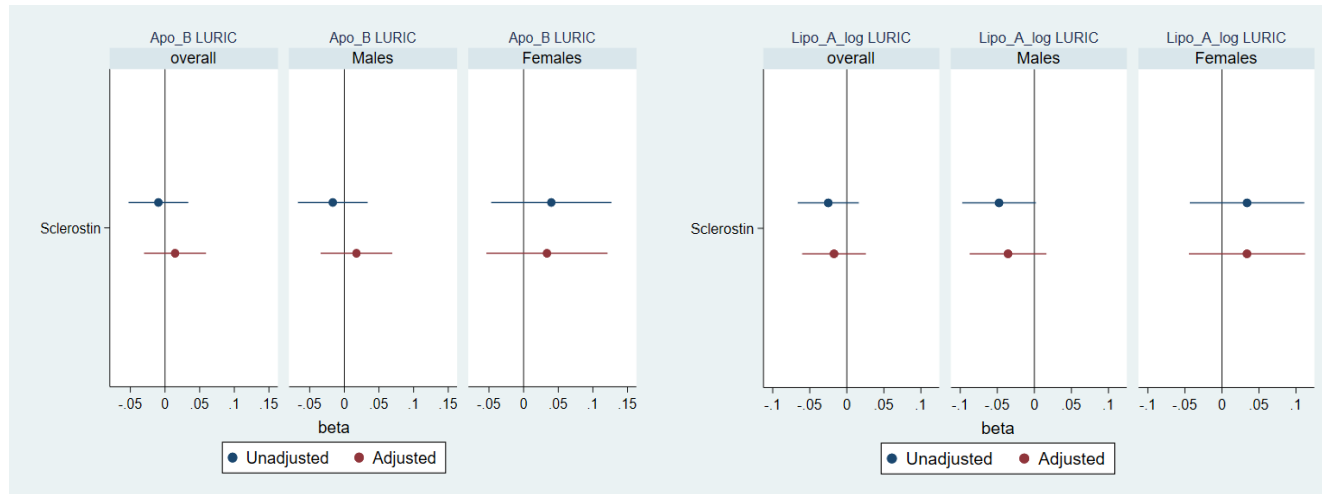

**Supplementary Figure 11: Associations between sclerostin versus lipids stratified by sex in LURIC.**
